# Supplementary material
Source: PubMed Central journal article supplement (PMC8556395)
Supplement: NIHMS1693594-supplement-1.pdf [file NIHMS1693594-supplement-1.pdf]

| <b>Supplemental Table 1: Associations between ICOH during neonatal REM sleep, indeterminate sleep, and wakefulness and 18-month language outcomes (Central electrodes)</b> |                         |                         |               |                                                                                                                                            |                         |                         |               |
|----------------------------------------------------------------------------------------------------------------------------------------------------------------------------|-------------------------|-------------------------|---------------|--------------------------------------------------------------------------------------------------------------------------------------------|-------------------------|-------------------------|---------------|
| <b>Association between LEFT hemisphere ICOH<sup>a</sup> (C3-Cz EEG electrodes) during neonatal REM<sup>b</sup> sleep and 18-month language outcomes</b>                    |                         |                         |               | <b>Association between RIGHT hemisphere ICOH (C4-Cz EEG electrodes) during neonatal REM sleep and 18-month language outcomes</b>           |                         |                         |               |
| EEG Frequency                                                                                                                                                              | Maternal Voice Playback | C3-Cz ICOH all subjects |               | EEG Frequency                                                                                                                              | Maternal Voice Playback | C4-Cz ICOH all subjects |               |
|                                                                                                                                                                            |                         | rho                     | p-value       |                                                                                                                                            |                         | rho                     | p-value       |
| 0.33-2 Hz                                                                                                                                                                  | off                     | -0.136                  | 0.436         | 0.33-2 Hz                                                                                                                                  | off                     | 0.032                   | 0.854         |
| 2-4 Hz                                                                                                                                                                     | off                     | -0.157                  | 0.368         | 2-4 Hz                                                                                                                                     | off                     | -0.216                  | 0.213         |
| 4-8 Hz                                                                                                                                                                     | off                     | -0.182                  | 0.295         | 4-8 Hz                                                                                                                                     | off                     | -0.284                  | 0.098         |
| 8-12 Hz                                                                                                                                                                    | off                     | <b>-0.371</b>           | <b>0.028*</b> | 8-12 Hz                                                                                                                                    | off                     | -0.285                  | 0.097         |
| 12-16 Hz                                                                                                                                                                   | off                     | -0.233                  | 0.178         | 12-16 Hz                                                                                                                                   | off                     | <b>-0.368</b>           | <b>0.029*</b> |
| 16-30 Hz                                                                                                                                                                   | off                     | -0.141                  | 0.419         | 16-30 Hz                                                                                                                                   | off                     | -0.318                  | 0.063         |
| 0.33-2 Hz                                                                                                                                                                  | on                      | -0.042                  | 0.819         | 0.33-2 Hz                                                                                                                                  | on                      | 0.075                   | 0.684         |
| 2-4 Hz                                                                                                                                                                     | on                      | -0.130                  | 0.478         | 2-4 Hz                                                                                                                                     | on                      | -0.245                  | 0.177         |
| 4-8 Hz                                                                                                                                                                     | on                      | -0.177                  | 0.331         | 4-8 Hz                                                                                                                                     | on                      | -0.274                  | 0.129         |
| 8-12 Hz                                                                                                                                                                    | on                      | -0.348                  | 0.051         | 8-12 Hz                                                                                                                                    | on                      | -0.254                  | 0.160         |
| 12-16 Hz                                                                                                                                                                   | on                      | <b>-0.503</b>           | <b>0.003*</b> | 12-16 Hz                                                                                                                                   | on                      | -0.238                  | 0.189         |
| 16-30 Hz                                                                                                                                                                   | on                      | <b>-0.377</b>           | <b>0.033*</b> | 16-30 Hz                                                                                                                                   | on                      | -0.195                  | 0.285         |
| <b>Association between LEFT hemisphere ICOH (C3-Cz EEG electrodes) during neonatal indeterminate sleep and 18-month language outcomes</b>                                  |                         |                         |               | <b>Association between RIGHT hemisphere ICOH (C4-Cz EEG electrodes) during neonatal indeterminate sleep and 18-month language outcomes</b> |                         |                         |               |
| EEG Frequency                                                                                                                                                              | Maternal Voice Playback | C3-Cz ICOH all subjects |               | EEG Frequency                                                                                                                              | Maternal Voice Playback | C4-Cz ICOH all subjects |               |
|                                                                                                                                                                            |                         | rho                     | p-value       |                                                                                                                                            |                         | rho                     | p-value       |
| 0.33-2 Hz                                                                                                                                                                  | off                     | -0.138                  | 0.429         | 0.33-2 Hz                                                                                                                                  | off                     | -0.048                  | 0.784         |
| 2-4 Hz                                                                                                                                                                     | off                     | -0.310                  | 0.070         | 2-4 Hz                                                                                                                                     | off                     | -0.086                  | 0.621         |
| 4-8 Hz                                                                                                                                                                     | off                     | -0.191                  | 0.272         | 4-8 Hz                                                                                                                                     | off                     | -0.226                  | 0.192         |
| 8-12 Hz                                                                                                                                                                    | off                     | <b>-0.357</b>           | <b>0.035*</b> | 8-12 Hz                                                                                                                                    | off                     | -0.250                  | 0.147         |
| 12-16 Hz                                                                                                                                                                   | off                     | -0.277                  | 0.107         | 12-16 Hz                                                                                                                                   | off                     | -0.212                  | 0.222         |
| 16-30 Hz                                                                                                                                                                   | off                     | -0.052                  | 0.768         | 16-30 Hz                                                                                                                                   | off                     | -0.240                  | 0.164         |
| 0.33-2 Hz                                                                                                                                                                  | on                      | <b>-0.477</b>           | <b>0.006*</b> | 0.33-2 Hz                                                                                                                                  | on                      | -0.244                  | 0.178         |
| 2-4 Hz                                                                                                                                                                     | on                      | <b>-0.501</b>           | <b>0.003*</b> | 2-4 Hz                                                                                                                                     | on                      | -0.268                  | 0.138         |
| 4-8 Hz                                                                                                                                                                     | on                      | -0.339                  | 0.058         | 4-8 Hz                                                                                                                                     | on                      | -0.303                  | 0.092         |
| 8-12 Hz                                                                                                                                                                    | on                      | <b>-0.475</b>           | <b>0.006*</b> | 8-12 Hz                                                                                                                                    | on                      | -0.302                  | 0.093         |
| 12-16 Hz                                                                                                                                                                   | on                      | -0.299                  | 0.096         | 12-16 Hz                                                                                                                                   | on                      | -0.313                  | 0.082         |
| 16-30 Hz                                                                                                                                                                   | on                      | -0.312                  | 0.082         | 16-30 Hz                                                                                                                                   | on                      | -0.181                  | 0.322         |
| <b>Association between LEFT hemisphere ICOH (C3-Cz EEG electrodes) during neonatal wakefulness and 18-month language outcomes</b>                                          |                         |                         |               | <b>Association between RIGHT hemisphere ICOH (C4-Cz EEG electrodes) during neonatal wakefulness and 18-month language outcomes</b>         |                         |                         |               |
| EEG Frequency                                                                                                                                                              | Maternal Voice Playback | C3-Cz ICOH all subjects |               | EEG Frequency                                                                                                                              | Maternal Voice Playback | C4-Cz ICOH all subjects |               |
|                                                                                                                                                                            |                         | rho                     | p-value       |                                                                                                                                            |                         | rho                     | p-value       |
| 0.33-2 Hz                                                                                                                                                                  | off                     | 0.069                   | 0.692         | 0.33-2 Hz                                                                                                                                  | off                     | 0.192                   | 0.268         |
| 2-4 Hz                                                                                                                                                                     | off                     | -0.137                  | 0.434         | 2-4 Hz                                                                                                                                     | off                     | 0.172                   | 0.323         |
| 4-8 Hz                                                                                                                                                                     | off                     | -0.068                  | 0.696         | 4-8 Hz                                                                                                                                     | off                     | -0.114                  | 0.516         |
| 8-12 Hz                                                                                                                                                                    | off                     | -0.246                  | 0.154         | 8-12 Hz                                                                                                                                    | off                     | -0.125                  | 0.475         |
| 12-16 Hz                                                                                                                                                                   | off                     | <b>-0.362</b>           | <b>0.033*</b> | 12-16 Hz                                                                                                                                   | off                     | -0.257                  | 0.136         |
| 16-30 Hz                                                                                                                                                                   | off                     | -0.095                  | 0.586         | 16-30 Hz                                                                                                                                   | off                     | -0.016                  | 0.927         |
| 0.33-2 Hz                                                                                                                                                                  | on                      | -0.193                  | 0.291         | 0.33-2 Hz                                                                                                                                  | on                      | 0.019                   | 0.917         |
| 2-4 Hz                                                                                                                                                                     | on                      | -0.254                  | 0.160         | 2-4 Hz                                                                                                                                     | on                      | 0.027                   | 0.883         |
| 4-8 Hz                                                                                                                                                                     | on                      | -0.214                  | 0.240         | 4-8 Hz                                                                                                                                     | on                      | -0.294                  | 0.103         |
| 8-12 Hz                                                                                                                                                                    | on                      | <b>-0.349</b>           | <b>0.050*</b> | 8-12 Hz                                                                                                                                    | on                      | -0.25                   | 0.168         |

|          |    |        |       |          |    |        |       |
|----------|----|--------|-------|----------|----|--------|-------|
| 12-16 Hz | on | -0.321 | 0.073 | 12-16 Hz | on | -0.244 | 0.178 |
| 16-30 Hz | on | -0.167 | 0.361 | 16-30 Hz | on | -0.049 | 0.791 |

<sup>a</sup>REM = rapid eye movement

<sup>b</sup>ICOH = imaginary part of the coherence (presented as average ICOH across each frequency range)

\*denotes  $p < 0.05$

| Supplemental Table: Associations between ICOH during neonatal REM sleep, indeterminate sleep, and wakefulness and 18-month language outcomes (temporal electrodes) |                         |                         |                |                                                                                                                                     |                         |                         |               |
|--------------------------------------------------------------------------------------------------------------------------------------------------------------------|-------------------------|-------------------------|----------------|-------------------------------------------------------------------------------------------------------------------------------------|-------------------------|-------------------------|---------------|
| Association between LEFT hemisphere ICOH <sup>a</sup> (T3-Cz EEG electrodes) during neonatal REM <sup>b</sup> sleep and 18-month language outcomes                 |                         |                         |                | Association between RIGHT hemisphere ICOH (T4-Cz EEG electrodes) during neonatal REM sleep and 18-month language outcomes           |                         |                         |               |
| EEG Frequency                                                                                                                                                      | Maternal Voice Playback | T3-Cz ICOH all subjects |                | EEG Frequency                                                                                                                       | Maternal Voice Playback | T4-Cz ICOH all subjects |               |
|                                                                                                                                                                    |                         | rho                     | p-value        |                                                                                                                                     |                         | rho                     | p-value       |
| 0.33-2 Hz                                                                                                                                                          | off                     | 0.093                   | 0.594          | 0.33-2 Hz                                                                                                                           | off                     | 0.042                   | 0.810         |
| 2-4 Hz                                                                                                                                                             | off                     | -0.114                  | 0.515          | 2-4 Hz                                                                                                                              | off                     | -0.091                  | 0.603         |
| 4-8 Hz                                                                                                                                                             | off                     | -0.23                   | 0.184          | 4-8 Hz                                                                                                                              | off                     | -0.188                  | 0.279         |
| 8-12 Hz                                                                                                                                                            | off                     | -0.241                  | 0.163          | 8-12 Hz                                                                                                                             | off                     | -0.120                  | 0.493         |
| 12-16 Hz                                                                                                                                                           | off                     | -0.148                  | 0.395          | 12-16 Hz                                                                                                                            | off                     | -0.267                  | 0.121         |
| 16-30 Hz                                                                                                                                                           | off                     | <b>-0.380</b>           | <b>0.024*</b>  | 16-30 Hz                                                                                                                            | off                     | -0.261                  | 0.130         |
| 0.33-2 Hz                                                                                                                                                          | on                      | 0.124                   | 0.498          | 0.33-2 Hz                                                                                                                           | on                      | 0.057                   | 0.755         |
| 2-4 Hz                                                                                                                                                             | on                      | -0.207                  | 0.255          | 2-4 Hz                                                                                                                              | on                      | -0.240                  | 0.186         |
| 4-8 Hz                                                                                                                                                             | on                      | -0.265                  | 0.143          | 4-8 Hz                                                                                                                              | on                      | -0.231                  | 0.204         |
| 8-12 Hz                                                                                                                                                            | on                      | <b>-0.355</b>           | <b>0.046*</b>  | 8-12 Hz                                                                                                                             | on                      | -0.173                  | 0.344         |
| 12-16 Hz                                                                                                                                                           | on                      | <b>-0.495</b>           | <b>0.004*</b>  | 12-16 Hz                                                                                                                            | on                      | -0.093                  | 0.611         |
| 16-30 Hz                                                                                                                                                           | on                      | <b>-0.565</b>           | <b>0.001*</b>  | 16-30 Hz                                                                                                                            | on                      | -0.098                  | 0.593         |
| Association between LEFT hemisphere ICOH (TC3-Cz EEG electrodes) during neonatal indeterminate sleep and 18-month language outcomes                                |                         |                         |                | Association between RIGHT hemisphere ICOH (T4-Cz EEG electrodes) during neonatal indeterminate sleep and 18-month language outcomes |                         |                         |               |
| EEG Frequency                                                                                                                                                      | Maternal Voice Playback | T3-Cz ICOH all subjects |                | EEG Frequency                                                                                                                       | Maternal Voice Playback | T4-Cz ICOH all subjects |               |
|                                                                                                                                                                    |                         | rho                     | p-value        |                                                                                                                                     |                         | rho                     | p-value       |
| 0.33-2 Hz                                                                                                                                                          | off                     | 0.100                   | 0.57           | 0.33-2 Hz                                                                                                                           | off                     | -0.089                  | 0.611         |
| 2-4 Hz                                                                                                                                                             | off                     | -0.078                  | 0.658          | 2-4 Hz                                                                                                                              | off                     | -0.134                  | 0.443         |
| 4-8 Hz                                                                                                                                                             | off                     | -0.259                  | 0.133          | 4-8 Hz                                                                                                                              | off                     | -0.217                  | 0.211         |
| 8-12 Hz                                                                                                                                                            | off                     | <b>-0.337</b>           | <b>0.048*</b>  | 8-12 Hz                                                                                                                             | off                     | -0.288                  | 0.094         |
| 12-16 Hz                                                                                                                                                           | off                     | <b>-0.404</b>           | <b>0.016*</b>  | 12-16 Hz                                                                                                                            | off                     | <b>-0.353</b>           | <b>0.037*</b> |
| 16-30 Hz                                                                                                                                                           | off                     | <b>-0.504</b>           | <b>0.002*</b>  | 16-30 Hz                                                                                                                            | off                     | -0.309                  | 0.071         |
| 0.33-2 Hz                                                                                                                                                          | on                      | -0.133                  | 0.468          | 0.33-2 Hz                                                                                                                           | on                      | -0.109                  | 0.551         |
| 2-4 Hz                                                                                                                                                             | on                      | <b>-0.44</b>            | <b>0.012*</b>  | 2-4 Hz                                                                                                                              | on                      | <b>-0.367</b>           | <b>0.039*</b> |
| 4-8 Hz                                                                                                                                                             | on                      | <b>-0.379</b>           | <b>0.033*</b>  | 4-8 Hz                                                                                                                              | on                      | -0.213                  | 0.242         |
| 8-12 Hz                                                                                                                                                            | on                      | <b>-0.381</b>           | <b>0.031*</b>  | 8-12 Hz                                                                                                                             | on                      | -0.210                  | 0.248         |
| 12-16 Hz                                                                                                                                                           | on                      | <b>-0.570</b>           | <b>0.001*</b>  | 12-16 Hz                                                                                                                            | on                      | <b>-0.498</b>           | <b>0.004*</b> |
| 16-30 Hz                                                                                                                                                           | on                      | <b>-0.637</b>           | <b>0.0001*</b> | 16-30 Hz                                                                                                                            | on                      | -0.164                  | 0.368         |
| Association between LEFT hemisphere ICOH (T3-Cz EEG electrodes) during neonatal wakefulness and 18-month language outcomes                                         |                         |                         |                | Association between RIGHT hemisphere ICOH (T4-Cz EEG electrodes) during neonatal wakefulness and 18-month language outcomes         |                         |                         |               |
| EEG Frequency                                                                                                                                                      | Maternal Voice Playback | T3-Cz ICOH all subjects |                | EEG Frequency                                                                                                                       | Maternal Voice Playback | T4-Cz ICOH all subjects |               |
|                                                                                                                                                                    |                         | rho                     | p-value        |                                                                                                                                     |                         | rho                     | p-value       |
| 0.33-2 Hz                                                                                                                                                          | off                     | -0.074                  | 0.675          | 0.33-2 Hz                                                                                                                           | off                     | 0.206                   | 0.235         |
| 2-4 Hz                                                                                                                                                             | off                     | -0.063                  | 0.720          | 2-4 Hz                                                                                                                              | off                     | 0.198                   | 0.254         |
| 4-8 Hz                                                                                                                                                             | off                     | -0.142                  | 0.415          | 4-8 Hz                                                                                                                              | off                     | -0.209                  | 0.227         |
| 8-12 Hz                                                                                                                                                            | off                     | -0.080                  | 0.649          | 8-12 Hz                                                                                                                             | off                     | -0.129                  | 0.459         |
| 12-16 Hz                                                                                                                                                           | off                     | <b>-0.339</b>           | <b>0.046*</b>  | 12-16 Hz                                                                                                                            | off                     | <b>-0.444</b>           | <b>0.008*</b> |
| 16-30 Hz                                                                                                                                                           | off                     | <b>-0.484</b>           | <b>0.003*</b>  | 16-30 Hz                                                                                                                            | off                     | -0.188                  | 0.279         |
| 0.33-2 Hz                                                                                                                                                          | on                      | -0.008                  | 0.967          | 0.33-2 Hz                                                                                                                           | on                      | 0.159                   | 0.386         |
| 2-4 Hz                                                                                                                                                             | on                      | -0.123                  | 0.501          | 2-4 Hz                                                                                                                              | on                      | 0.020                   | 0.914         |
| 4-8 Hz                                                                                                                                                             | on                      | -0.312                  | 0.083          | 4-8 Hz                                                                                                                              | on                      | -0.099                  | 0.589         |
| 8-12 Hz                                                                                                                                                            | on                      | -0.178                  | 0.330          | 8-12 Hz                                                                                                                             | on                      | -0.165                  | 0.366         |
| 12-16 Hz                                                                                                                                                           | on                      | <b>-0.464</b>           | <b>0.007*</b>  | 12-16 Hz                                                                                                                            | on                      | <b>-0.356</b>           | <b>0.046*</b> |

|          |    |               |               |          |    |        |       |
|----------|----|---------------|---------------|----------|----|--------|-------|
| 16-30 Hz | on | <b>-0.439</b> | <b>0.012*</b> | 16-30 Hz | on | -0.304 | 0.091 |
|----------|----|---------------|---------------|----------|----|--------|-------|

<sup>a</sup>REM = rapid eye movement

<sup>b</sup>ICOH = imaginary part of the coherence (presented as average ICOH across each frequency range)

\*denotes  $p < 0.05$
